# Supplementary material for: Fibrosis and birthweight correlated with telomere shortening in paediatric metabolic dysfunction-associated steatotic liver disease
Source: Research Square preprint supplement (doi:10.21203/rs.3.rs-7427772/v1), 2025-09-17
Supplement: Supplementary file 1 [file 06e12ab3568feba3a1de3c1a.docx]

**Supplementary Information**

**Fibrosis and birthweight correlated with telomere shortening in paediatric metabolic dysfunction-associated steatotic liver disease**

Maria Rita Braghini1, Salvatore Daniele Bianco2, Marzia Bianchi1, Giulia Andolina1,Antonella Mosca3, Cristiano De Stefanis4, Michela Piccione4, Paola Francalanci5, Clara Balsano6,7, Luca Miele8, Tommaso Mazza2*, Anna Alisi1*

***List of supplementary materials:***

Supplementary methods, page 2

Table S1, page 4

Table S2, page 5

Table S3, page 6

**Supplementary methods**

***Nucleic acid extraction and qPCR in liver tissue samples***

Total RNA and DNA were extracted from liver specimens using the AllPrep DNA/RNA/Protein Mini Kit (Qiagen) according to the manufacturer’s protocol. cDNA reverse transcription was conducted using the SuperScript VILO cDNA Synthesis kit (Invitrogen-Thermo Fisher Scientific). qPCR amplification, detection, and analysis were performed by QuantStudio 7 Pro Real-Time PCR System (Applied Biosystems-Thermo Fisher Scientific) using TaqMan Universal PCR Master Mix, No AmpErase UNG (Applied Biosystems-Thermo Fisher Scientific). The mRNA expression level of the TERT gene was determined using a specific TaqMan probe (TERT, Hs00972650_m1) and normalized to the endogenous control gene glyceraldehyde-3-phosphate dehydrogenase (GAPDH, Hs02786624_g1) purchased from Applied Biosystems-Thermo Fisher Scientific. Gene expression levels were represented as fold-changes relative to the control and were calculated using the ΔΔCt method.

*Immunofluorescence in liver tissue samples*

The 2µm slices were obtained from formalin-fixed and paraffin-embedded human liver tissue specimens. After dewaxing and rehydration, heat-induced epitope retrieval was performed by boiling the slides with Dako Target Retrieval Solution EDTA (pH 9) (Dako-Agilent Technologies, Santa Clara, CA, USA). The primary antibody was diluted 1:100 in PBS/BSA 1% and incubated overnight at 4°C (TERT antibody, ab230527, Abcam, Cambridge, UK). The primary antibody was revealed with the secondary antibody diluted 1:500 in PBS/BSA 1% (Rabbit IgG (H+L) Cross-Adsorbed Secondary Antibody Alexa Fluor 488, A-11070, Invitrogen-Thermo Fisher Scientific). Cell nuclei were counterstained with Hoechst (Invitrogen-Thermo Fisher Scientific). Samples were digitalised by using the Hamamatsu Nanozoomer S60 Digital slide scanner C13210–01 (Hamamatsu Photonics, Shizuoka, Japan), equipped with an Olympus 20X/0.75 and 40X/1.40 PlanSApo objectives (Olympus, Tokyo, Japan), a Fluorescence Imaging Module with a LX2000 mercury lamp (Hamamatsu Photonics), a linear ORCA-Flash 4.0 digital CMOS camera (Hamamatsu Photonics). Whole slide images were used to manually draw the region of interest and perform quantitative fluorescence imaging analysis (QFIA). The average intensity of fluorescence in at least five fields per sample was calculated using ImageJ software, version 1.54n (National Institutes of Health, Bethesda, MD, USA). Images were also acquired by confocal microscopy performed on an Olympus Fluoview FV3000 Confocal Laser Scanning Microscope (Olympus).

**Table S1. Characteristics of the study population.**

| *Variable* | *CTRL (n=31)* | *MASLD (n=212)* | *P value* |
| --- | --- | --- | --- |
| *Gender (M/F)* | 16/15 | 131/81 | 0.3267 |
| *Age (years)* | 8 (2 – 18) | 13.7 (5.2 – 17.9) | **<0.0001** |
| *BMI (kg/m2)* | 17.2 (11.9 – 29.6) | 29.1 (16.5 – 47.4) | **<0.0001** |
| *Triglycerides (mg/dL)* | 61.0 (26.0 – 116.0) | 93.0 (35.0 – 277.0) | **<0.0001** |
| *Total cholesterol (mg/dL)* | 151.0 (95.0 – 244.0) | 156.0 (91.0 – 298.0) | 0.9799 |
| *HDL cholesterol (mg/dL)* | 60.0 (32.0 – 80.0) | 48.0 (20.0 – 114.0) | **0.0036** |
| *LDL cholesterol (mg/dL)* | 82.0 (56.0 – 99.0) | 83.0 (33.0 – 153.0) | 0.6126 |
| *ALT (IU/mL)* | 20.0 (12.0 – 61.0) | 36.0 (8.0 – 265.0) | **0.0015** |
| *AST (IU/mL)* | 35.0 (15.0 – 68.0) | 27.0 (12.0 – 109.0) | 0.5994 |

Values are expressed as median and range (minimum – maximum). Fisher’s exact test for gender distribution and the Mann-Whitney test for continuous variables.

Abbreviations: CTRL, controls; MASLD, metabolic dysfunction-associated steatotic liver disease; M, males; F, females; BMI, body mass index; HDL, high-density lipoprotein; LDL, low-density lipoprotein; ALT, alanine transaminase; AST, aspartate transaminase.

**Table S2. Histological features of the liver of patients with MASLD.** Number of cases and percentage of histological features grades in non-MASH and MASH groups.

| *Histological traits (stages)* | *non-MASH (n=67)* | *MASH (n=145)* |
| --- | --- | --- |
| *Steatosis*  *1*  *2*  *3* | 47 (70%)  18 (27%)  2 (3%) | 5 (3%)  40 (28%)  100 (69%) |
| *Portal Inflammation*  *0*  *1*  *2* | 7 (10%)  56 (84%)  4 (6%) | 24 (17%)  105 (72%)  16 (11%) |
| *Lobular Inflammation*  *0*  *1*  *2* | 19 (29%)  47 (70%)  1 (1%) | -  136 (94%)  9 (6%) |
| *Ballooning*  *0*  *1*  *2* | 31 (46%)  35 (53%)  1 (1%) | 1 (1%)  82 (57%)  62 (42%) |
| *Fibrosis*  *0*  *1*  *2*  *3* | 42 (63%)  25 (37%)  -  - | 3 (2%)  85 (59%)  57 (39%)  - |
| *NAS*  *1*  *2*  *3*  *4*  *5*  *6*  *7* | 3 (4%)  24 (36%)  36 (54%)  4 (6%)  -  -  - | -  -  -  30 (21%)  64 (44%)  50 (34%)  1 (1%) |

Abbreviations: MASH, metabolic dysfunction-associated steatohepatitis; NAS, NAFLD activity score.

**Table S3. Multiple linear regression analysis of LTL estimates in patients with MASLD.**

| *Dependent variable: log-TL* |  | *Model 1* |  |  | *Model 2* |  |
| --- | --- | --- | --- | --- | --- | --- |
|  | *β* | *SE* | *p value* | *β* | *SE* | *p value* |
| *Intercept* | 52.861 | 18.249 | **0.005** | 50.096 | 16.514 | **0.003** |
| *Age (years)* | -0.761 | 0.708 | 0.285 | - | - | - |
| *BMI (kg/m2)* | 0.345 | 0.515 | 0.504 | - | - | - |
| *WC (cm)* | 0.064 | 0.173 | 0.711 | 0.086 | 0.149 | 0.567 |
| *Triglycerides (mg/dL)* | -0.009 | 0.033 | 0.794 | -0.016 | 0.032 | 0.617 |
| *Total cholesterol (mg/dL)* | -0.071 | 0.053 | 0.181 | -0.064 | 0.051 | 0.207 |
| *HDL cholesterol (mg/dL)* | 0.025 | 0.092 | 0.783 | 0.020 | 0.091 | 0.827 |
| *LDL cholesterol (mg/dL)* | -0.019 | 0.074 | 0.795 | -0.018 | 0.070 | 0.797 |
| *ALT (IU/mL)* | -0.036 | 0.084 | 0.671 | -0.021 | 0.082 | 0.801 |
| *AST (IU/mL)* | 0.098 | 0.194 | 0.614 | 0.077 | 0.192 | 0.690 |
| *GGT (IU/mL)* | 0.048 | 0.094 | 0.613 | 0.038 | 0.093 | 0.683 |
| *HOMA-IR* | -2.180 | 1.165 | 0.064 | -2.044 | 1.134 | 0.074 |

Model 1 R2=0.077; Model 2 R2=0.065.

Abbreviations: log-TL, natural logarithm of telomere length in kilobases; β, regression coefficient; SE, standard error; BMI, body mass index; WC, waist circumference; HDL, high-density lipoprotein; LDL, low-density lipoprotein; ALT, alanine transaminase; AST, aspartate transaminase; GGT, gamma glutamyl transpeptidase; HOMA-IR, homeostasis model assessment of insulin resistance.
